# Supplementary material for: SDM6A: A Web-Based Integrative Machine-Learning Framework for Predicting 6mA Sites in the Rice Genome
Source: PubMed Central journal article supplement (PMC6796762; doi:10.1016/j.omtn.2019.08.011), 2019-08-16
Supplement: mmc1.pdf [file mmc1.pdf]

**OMTN, Volume 18**

**Supplemental Information**

**SDM6A: A Web-Based Integrative  
Machine-Learning Framework for Predicting  
6mA Sites in the Rice Genome**

**Shaherin Basith, Balachandran Manavalan, Tae Hwan Shin, and Gwang Lee**

Figure S1. Performance of four different ML classifiers with respect to using five feature descriptors to distinguish between 6mA sites and non-6mA sites on independent dataset. (A) RF, (B) ERT, (C) XGB, and (D) SVM.

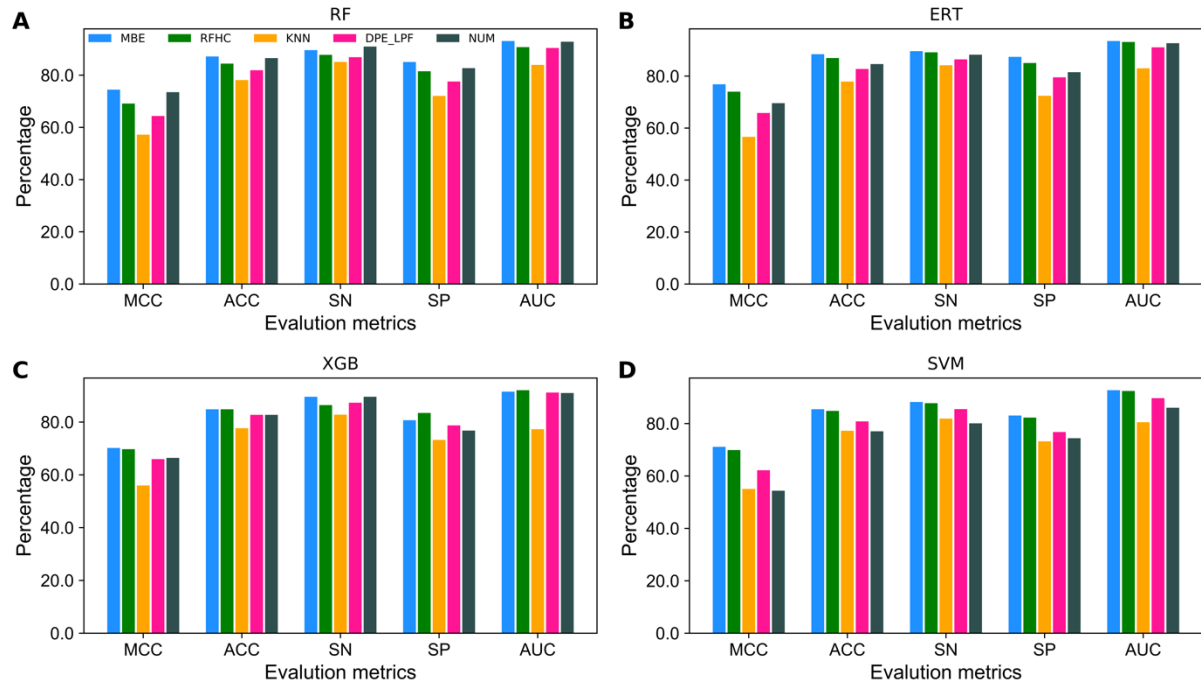

Figure S2. Performance of four different ML classifiers with respect to using nine feature descriptors to distinguish between 6mA sites and non-6mA sites on benchmark dataset. (A) RF, (B) ERT, (C) XGB, and (D) SVM.

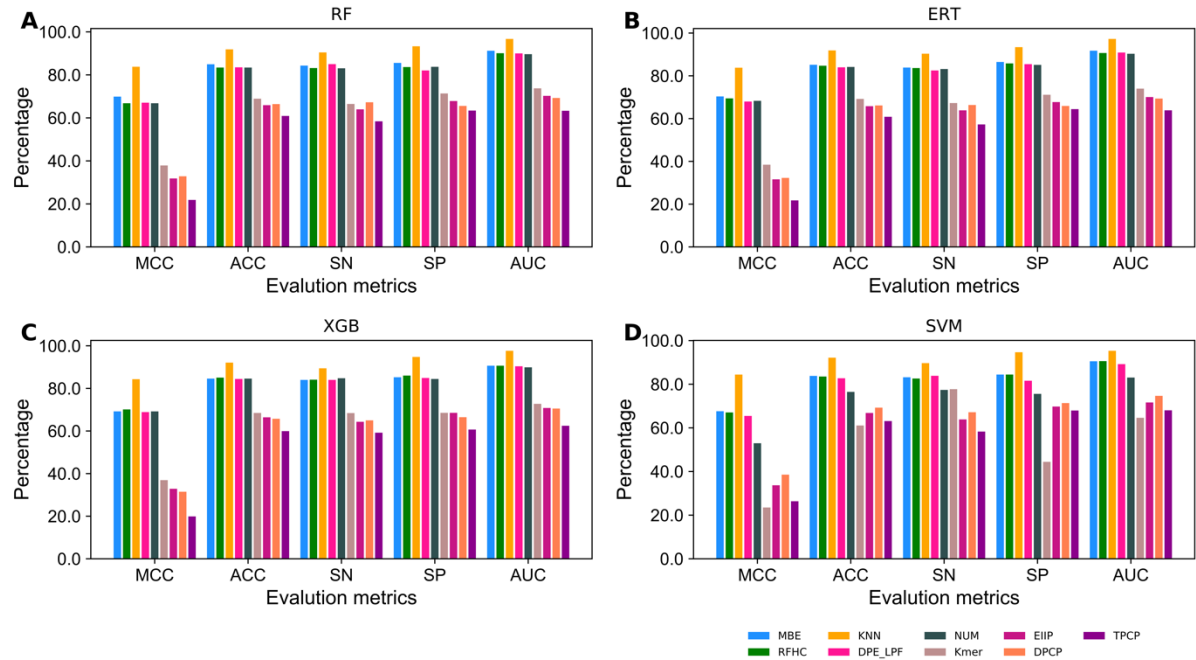

Table S1. Performances of four different classifiers using optimal feature set in distinguishing 6mAs and non-6mAs with respect to four different feature encodings.

| Feature encoding | Method | MCC   | ACC   | SN    | SP    | AUC   |
|------------------|--------|-------|-------|-------|-------|-------|
| MBE              | RF     | 0.718 | 0.859 | 0.864 | 0.855 | 0.922 |
|                  | ERT    | 0.719 | 0.860 | 0.858 | 0.861 | 0.925 |
|                  | SVM    | 0.719 | 0.860 | 0.852 | 0.867 | 0.921 |
|                  | XGB    | 0.705 | 0.852 | 0.867 | 0.838 | 0.921 |
| NUM              | RF     | 0.675 | 0.838 | 0.839 | 0.836 | 0.902 |
|                  | ERT    | 0.686 | 0.843 | 0.836 | 0.850 | 0.910 |
|                  | SVM    | 0.575 | 0.788 | 0.794 | 0.781 | 0.849 |
|                  | XGB    | 0.701 | 0.851 | 0.854 | 0.847 | 0.914 |
| RFHC             | RF     | 0.687 | 0.843 | 0.831 | 0.856 | 0.909 |
|                  | ERT    | 0.706 | 0.853 | 0.846 | 0.860 | 0.915 |
|                  | SVM    | 0.717 | 0.858 | 0.838 | 0.878 | 0.917 |
|                  | XGB    | 0.702 | 0.851 | 0.851 | 0.851 | 0.918 |
| DPE_LPF          | RF     | 0.684 | 0.842 | 0.843 | 0.841 | 0.912 |
|                  | ERT    | 0.690 | 0.845 | 0.830 | 0.860 | 0.912 |
|                  | SVM    | 0.691 | 0.846 | 0.850 | 0.841 | 0.911 |
|                  | XGB    | 0.696 | 0.848 | 0.853 | 0.842 | 0.907 |

Table S2. Performance comparison between SDM6A and i6mA-Pred on benchmark dataset using jackknife test.

| Method    | MCC   | ACC   | SN    | SP    | AUC   | P-value (AUC) |
|-----------|-------|-------|-------|-------|-------|---------------|
| SDM6A     | 0.774 | 0.887 | 0.878 | 0.896 | 0.948 | —             |
| i6mA-Pred | 0.660 | 0.831 | 0.830 | 0.831 | 0.886 | <0.000001     |

First column represents the method name employed in this study. The second, third, fourth, and the fifth columns, respectively, represent the MCC, accuracy (ACC), sensitivity (SN), and specificity (SP). The sixth and the seventh columns, respectively, represent the AUC and pairwise comparison of ROC area under curves (AUCs) between SDM6A and the i6mA-Pred using a two-tailed  $t$ -test<sup>1</sup>.

## Reference

1. Hanley, JA, and McNeil, BJ (1982). The meaning and use of the area under a receiver operating characteristic (ROC) curve. *Radiology* **143**: 29-36.
